# Supplementary material for: Inhibition of Cdk5 in PV Neurons Reactivates Experience-Dependent Plasticity in Adult Visual Cortex
Source: MDPI journal article supplement (doi:10.3390/ijms23010186), 2021-12-24
Supplement: s1 [file s1]

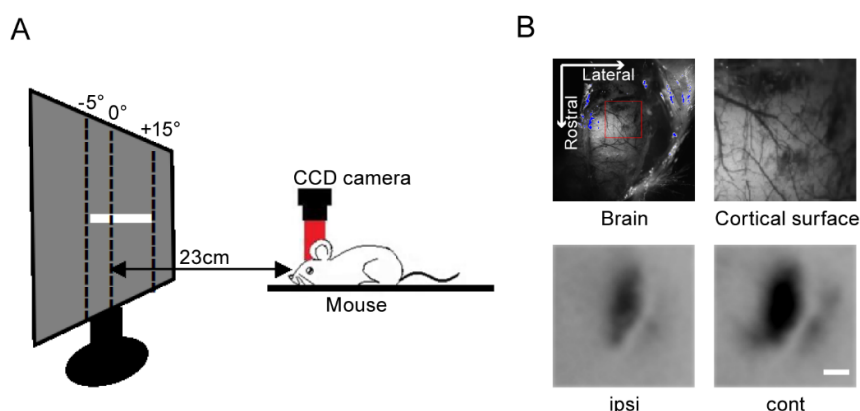

**Figure S1.** Experimental technique used for OD plasticity measurement. (A) Left: Schematic for imaging of intrinsic signals. (B) Top: Cortical blood vessel pattern was captured under green light. Bottom: Example response magnitude for stimulation in the binocular visual field under red light. Scale bar, 500  $\mu\text{m}$ .

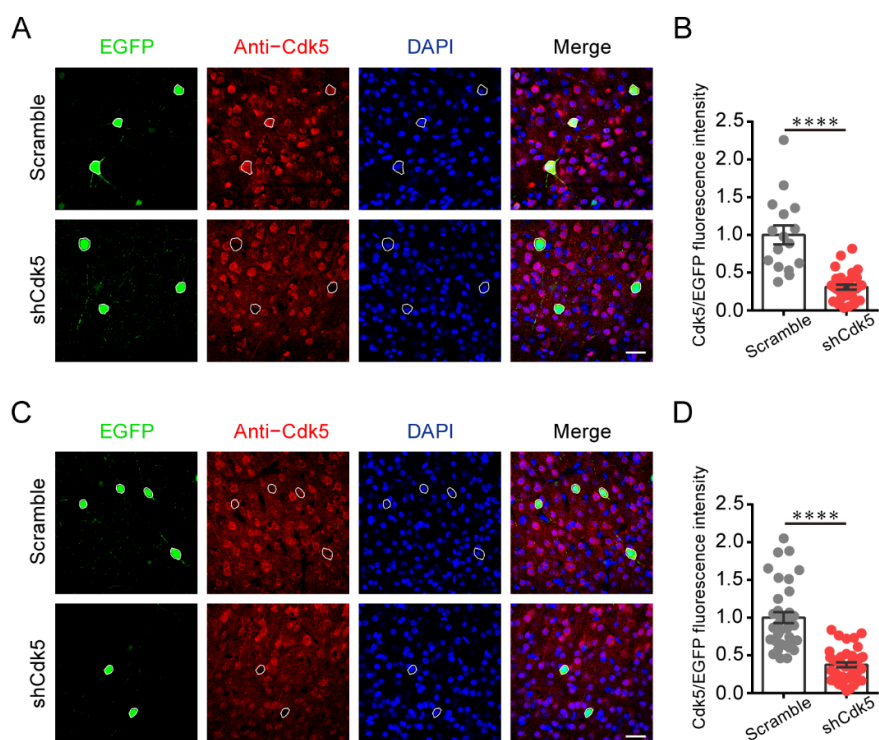

**Figure S2.** Genetic reduction in Cdk5 in SST or VIP neurons of the visual cortex. (A, C) IHC in V1 of SST- and VIP-Cre mice, virus-infected SST and VIP neurons (green) and Cdk5 immunoreactivity (red). Virus-infected neurons are enclosed by white hollow circles. Scale bar, 30  $\mu\text{m}$ . (B, D) Cdk5 was quantified by immunofluorescence using Abs against Cdk5 (SST: scramble =  $1.00 \pm 0.13$ ,  $n = 16$ ; shCdk5 =  $0.31 \pm 0.03$ ,  $n = 31$ ;  $t = 6.86$ ,  $p < 0.0001$ , unpaired  $t$ -test; VIP: scramble =  $1.00 \pm 0.07$ ,  $n = 35$ ; shCdk5 =  $0.38 \pm 0.03$ ,  $n = 42$ ;  $t = 8.32$ ,  $p < 0.0001$ , unpaired  $t$ -test). Data shown as mean  $\pm$  SEM.
